# Supplementary material
Source: PubMed Central journal article supplement (PMC11115946)
Supplement: 18_2010_262_MOESM1_ESM.pdf [file 18_2010_262_MOESM1_ESM.pdf]

**Table S1. Arg accessibility to solvents in the 3D models of PAD3 #.**

| % of accessibility to solvents |     |          |     |          |     |                   |     |          |     |          |     |
|--------------------------------|-----|----------|-----|----------|-----|-------------------|-----|----------|-----|----------|-----|
| PAD3 “empty” (WD8)             |     |          |     |          |     | PAD3 “full” (WDA) |     |          |     |          |     |
| 39 Arg                         |     | 20 Cit   |     | 39 Cit   |     | 39 Arg            |     | 10 Cit   |     | 39 Cit   |     |
| Position                       | %   | Position | %   | Position | %   | Position          | %   | Position | %   | Position | %   |
| Arg-5                          | 30  | Arg-5    | <30 | Cit-5    | <30 | Arg-5             | <30 | Arg-5    | <30 | Cit-5    | <30 |
| Arg-8                          | 50  | Cit-8    | 30  | Cit-8    | 30  | Arg-8             | 30  | Arg-8    | <30 | Cit-8    | 40  |
| Arg-58                         | 50  | Cit-58   | 50  | Cit-58   | 50  | Arg-58            | 40  | Cit-58   | 50  | Cit-58   | 50  |
| Arg-60                         | 50  | Cit-60   | 30  | Cit-60   | 50  | Arg-60            | 50  | Cit-60   | 50  | Cit-60   | 50  |
| Arg-62                         | 40  | Cit-62   | 30  | Cit-62   | 40  | Arg-62            | 50  | Cit-62   | 40  | Cit-62   | 40  |
| Arg-66                         | 50  | Cit-66   | 40  | Cit-66   | 50  | Arg-66            | <30 | Arg-66   | <30 | Cit-66   | <30 |
| Arg-67                         | <30 | Arg-67   | 30  | Cit-67   | 30  | Arg-67            | 30  | Arg-67   | 40  | Cit-67   | 50  |
| Arg-69                         | <30 | Arg-69   | <30 | Cit-69   | 30  | Arg-69            | <30 | Arg-69   | <30 | Cit-69   | 30  |
| Arg-128                        | 50  | Cit-128  | 40  | Cit-128  | 30  | Arg-128           | 40  | Cit-128  | 40  | Cit-128  | 40  |
| Arg-131                        | 40  | Cit-131  | <30 | Cit-131  | <30 | Arg-131           | 50  | Cit-131  | 60  | Cit-131  | 70  |
| Arg-137                        | 40  | Cit-137  | 30  | Cit-137  | 50  | Arg-137           | <30 | Arg-137  | <30 | Cit-137  | 30  |
| Arg-156                        | 30  | Arg-156  | <30 | Cit-156  | <30 | Arg-156           | <30 | Arg-156  | <30 | Cit-156  | <30 |
| Arg-186                        | <30 | Arg-186  | <30 | Cit-186  | <30 | Arg-186           | <30 | Arg-186  | <30 | Cit-186  | <30 |
| Arg-210                        | <30 | Arg-210  | <30 | Cit-210  | <30 | Arg-210           | <30 | Arg-210  | <30 | Cit-210  | <30 |
| Arg-227                        | 50  | Cit-227  | 40  | Cit-227  | <30 | Arg-227           | <30 | Arg-227  | <30 | Cit-227  | <30 |
| Arg-241                        | <30 | Arg-241  | <30 | Cit-241  | <30 | Arg-241           | <30 | Arg-241  | <30 | Cit-241  | <30 |
| Arg-248                        | 30  | Arg-248  | 30  | Cit-248  | <30 | Arg-248           | <30 | Arg-248  | <30 | Cit-248  | <30 |
| Arg-292                        | <30 | Arg-292  | <30 | Cit-292  | <30 | Arg-292           | <30 | Arg-292  | <30 | Cit-292  | <30 |
| Arg-312                        | 40  | Cit-312  | 30  | Cit-312  | 50  | Arg-312           | <30 | Arg-312  | <30 | Cit-312  | <30 |
| Arg-314                        | 50  | Cit-314  | 60  | Cit-314  | 50  | Arg-314           | <30 | Arg-314  | <30 | Cit-314  | <30 |
| Arg-328                        | 40  | Cit-328  | 40  | Cit-328  | 50  | Arg-328           | 40  | Cit-328  | 50  | Cit-328  | 50  |
| Arg-343                        | 60  | Cit-343  | 60  | Cit-343  | 60  | Arg-343           | 30  | Arg-343  | 30  | Cit-343  | 30  |
| Arg-346                        | 50  | Cit-346  | 30  | Cit-346  | 40  | Arg-346           | <30 | Arg-346  | <30 | Cit-346  | <30 |
| Arg-372                        | 40  | Cit-372  | 30  | Cit-372  | 40  | Arg-372           | <30 | Arg-372  | <30 | Cit-372  | <30 |
| Arg-383                        | 60  | Cit-383  | 60  | Cit-383  | 60  | Arg-383           | 30  | Arg-383  | <30 | Cit-383  | 40  |
| Arg-394                        | <30 | Arg-394  | <30 | Cit-394  | <30 | Arg-394           | <30 | Arg-394  | <30 | Cit-394  | <30 |
| Arg-397                        | 30  | Arg-397  | 40  | Cit-397  | 40  | Arg-397           | 30  | Arg-397  | 40  | Cit-397  | 40  |
| Arg-399                        | 50  | Cit-399  | 50  | Cit-399  | 60  | Arg-399           | 40  | Cit-399  | 40  | Cit-399  | 40  |
| Arg-427                        | <30 | Arg-427  | <30 | Cit-427  | <30 | Arg-427           | <30 | Arg-427  | <30 | Cit-427  | <30 |
| Arg-440                        | <30 | Arg-440  | <30 | Cit-440  | <30 | Arg-440           | <30 | Arg-440  | <30 | Cit-440  | <30 |
| Arg-441                        | <30 | Arg-441  | <30 | Cit-441  | <30 | Arg-441           | <30 | Arg-441  | <30 | Cit-441  | <30 |
| Arg-447                        | <30 | Arg-447  | <30 | Cit-447  | <30 | Arg-447           | <30 | Arg-447  | <30 | Cit-447  | <30 |
| Arg-487                        | <30 | Arg-487  | <30 | Cit-487  | <30 | Arg-487           | <30 | Arg-487  | <30 | Cit-487  | <30 |
| Arg-510                        | 60  | Cit-510  | 50  | Cit-510  | 50  | Arg-510           | 60  | Cit-510  | 40  | Cit-510  | 50  |
| Arg-552                        | <30 | Arg-552  | <30 | Cit-552  | <30 | Arg-552           | <30 | Arg-552  | <30 | Cit-552  | <30 |
| Arg-557                        | 40  | Cit-557  | 40  | Cit-557  | 50  | Arg-557           | 40  | Cit-557  | 40  | Cit-557  | 40  |
| Arg-577                        | 40  | Cit-577  | 50  | Cit-577  | 40  | Arg-577           | 50  | Cit-577  | 30  | Cit-577  | 30  |
| Arg-618                        | 30  | Arg-618  | 30  | Cit-618  | 30  | Arg-618           | <30 | Arg-618  | <30 | Cit-618  | <30 |
| Arg-652                        | <30 | Arg-652  | <30 | Cit-652  | <30 | Arg-652           | <30 | Arg-652  | <30 | Cit-652  | <30 |

# Three-dimensional models of PAD3 without bound-calcium and substrate (empty) or with bound-calcium and -benzoyl-L-arginine amide (full) were deduced from the PAD4 structures and the amino-acid sequence of PAD3. For each Arg, the accessibility to the solvents (in %) was computed. The most accessible Arg (% of accessibility  $\geq 40$ ) were then replaced by Cit, and the accessibility computed again. The same was done with all Arg replaced by Cit.

**Table S2. Volumes and surface areas of the entire molecule or C-terminal domain of PAD3 #.**

| <b>3D models of PAD3</b>         | <b>Volume</b> | <b>Surface</b> |
|----------------------------------|---------------|----------------|
| <i>Entire PAD3</i>               |               |                |
| PAD3 “empty” WD8 39 Arg          | 90669         | 31154          |
| PAD3 “empty” WD8 20 Cit          | 90905         | 29681          |
| PAD3 “full” WDA 39 Arg           | 91547         | 25107          |
| PAD3 “full” WDA 10 Cit           | 90976         | 24966          |
| <i>C-terminal domain of PAD3</i> |               |                |
| C-ter PAD3 “empty” WD8 39 Arg    | 50871         | 17172          |
| C-ter PAD3 “empty” WD8 20 Cit    | 50704         | 16639          |
| C-ter PAD3 “full” WDA 39 Arg     | 51572         | 13116          |
| C-ter PAD3 “full” WDA 10 Cit     | 50834         | 12861          |

# Volumes ( $\text{\AA}^3$ ) and surface areas ( $\text{\AA}^2$ ) were computed for PAD3 three-dimensional structures either without bound-calcium and substrate (empty) or with bound-calcium and -benzoyl-L-arginine amide as a substrate (full) using “Swiss-Pdb Viewer Deep View 4.0.1”. The same evaluation was made after substitutions of the most accessible Arg to Cit. The same was done for the C-terminal (C-ter) domain of PAD3 (from Pro-295 to Pro-664) containing the active site.

Figure S1: Schematic representation of the formula to evaluate a tetrahedron volume.

$$V = 1/12 \sqrt{(P - Q + R)}$$

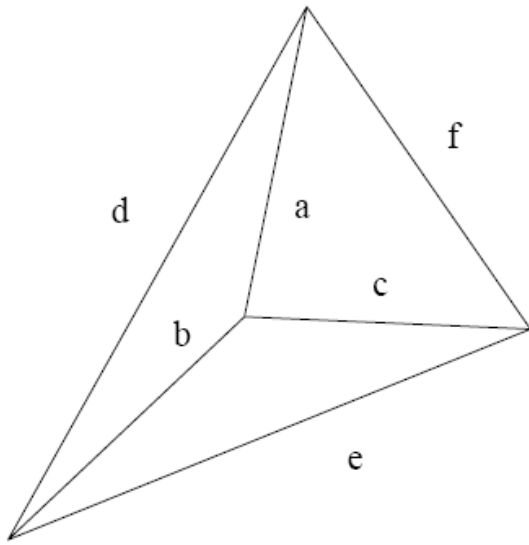

$$P = 4 a^2 b^2 c^2$$

$$Q = a^2 \cdot E^2 - b^2 \cdot F^2 - c^2 \cdot D^2$$

$$R = D \cdot E \cdot F$$

$$D = a^2 + b^2 - d^2$$

$$E = b^2 + c^2 - e^2$$

$$F = a^2 + c^2 - f^2$$

**Figure S2: Topological 3D models of PAD3 #.**

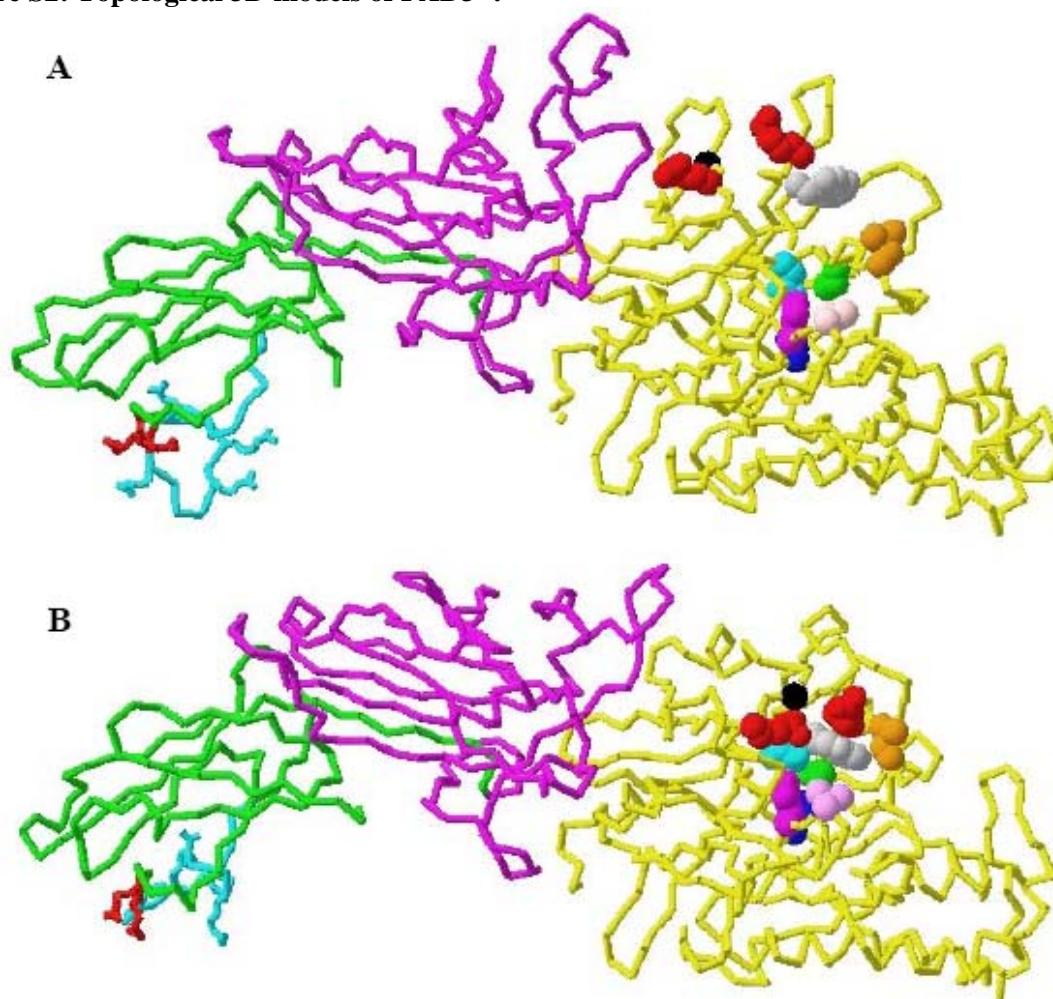

# 3D modeling of **A**,  $\text{Ca}^{2+}$ -free PAD3 (derived from 1WD8) and **B**,  $\text{Ca}^{2+}$ -bound PAD3. The immunoglobulin-like sub-domains 1 (residues 1-123) and 2 (residues 124-294) are in green and purple respectively, and the C-terminal domain (295-664) is in yellow. The lateral chains of the arginines of the peptide 49-66 in sky blue and of the Arg-67 and Arg-69 in red are reported on the structure to show their accessibility. Ten amino-acids major in the active site are shown using space-filling representation. The arginine (Arg-372), glycine (Gly-374) and leucine (Leu-640), probably involved in the substrate specificity of PAD3 are in red, black and orange respectively. The arginine (Arg-346), tryptophan (Trp-347) and valine (Val-468) recently reported as important in the active site of PAD4 and conserved in the other PADs are in red, grey and pink. Among the four amino-acids directly involved in the deimination reaction, the two aspartic acids (Asp-350 and Asp-472) are in sky

blue and blue navy, respectively, the histidine (His-470) is in purple and the cysteine (Cys-646) in green. As observed for PAD1 and PAD4 [1], the two structures are roughly superimposable.

**Figure S3: No decrease in the expression of Pad1 and Pad3 in the epidermis of VDR-null as compared to wild type mice #.**

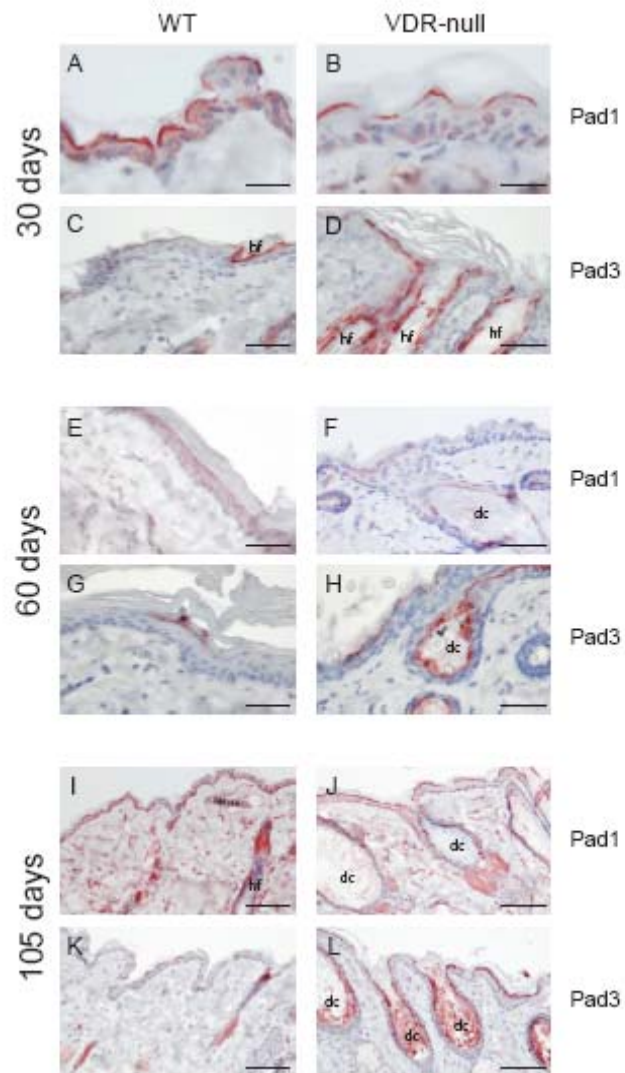

# Paraffin-embedded sections of 30 (A-D), 60 (E-H) and 105 (I-L) days old wild type (WT) (A, C, E, G, I and K) and VDR-null mice (B, D, F, H, J and L) were analyzed by immunohistochemical staining with the purified polyclonal antibodies against Pad1 and Pad3. Pad1 and Pad3 are located preferentially in the *stratum granulosum* of both WT and VDR-null mouse epidermis. No decrease in the detection level of both Pad1 and Pad3 was evidenced in the VDR-null mouse epidermis. Moreover Pad3 but not Pad1 was located in dermal cysts of the VDR-null mouse skin (H and L). hf (hair follicle); dc (dermal cyst). Bars in A -D = 100  $\mu$ m; bar in E-L = 200  $\mu$ m.

Method: Paraffin-embedded skin sections of WT and VDR-null mice were a kind gift from H. Palmer and G. Carmeliet (Cancer Research UK Cambridge research Institute, Cambridge,UK). Skin sections were deparaffinised and rehydrated using standard procedures. Immunohistochemistry was performed using the Histostain-Plus kit (Zymed) according to the manufacturer's instructions. Pad1 and Pad3 were detected using already described and validated isotype specific rabbit antipeptide antibodies at a concentration of 1 and 0.3  $\mu$ g/ml respectively. Before applying the primary antibodies, tissue sections were processed for heat-induced epitope retrieval using a target retrieval solution at pH 9.9 (Dako, #S3308) and pH 9 (Dako, #S2368) for Pad1 and Pad3 detection respectively. The slides were then incubated in a humidified chamber with their corresponding primary antibodies overnight at 4°C. Colour was developed in an aminoethyl carbazole substrate solution and the tissues were counterstained with hematoxylin. A normal rabbit antiserum was used as a negative control.
